# Supplementary material for: KB-templated in situ synthesis of highly dispersed bimetallic NiFe phosphides as efficient oxygen evolution catalysts
Source: Royal Society of Chemistry journal article supplement (doi:10.1039/d0qi00627k), 2020-01-01
Supplement: d0qi00627k1.pdf [file d0qi00627k1.pdf]

***Supporting Information***

**KB-templated, *in situ* synthesis of highly dispersed bimetallic NiFe phosphides as efficient oxygen evolution catalysts**

*Yunheng Li,<sup>[a]</sup> Lin Ge,<sup>[b]</sup> Yajun Zhou,<sup>\*[a]</sup> Liang Li,<sup>[a]</sup> Wei Li,<sup>[a]</sup> Jieyu Xu,<sup>[a]</sup> and*

*Yongsheng Li<sup>\*[a]</sup>*

<sup>a</sup> Lab of Low-Dimensional Materials Chemistry, Key Laboratory for Ultrafine Materials of Ministry of Education, Shanghai Engineering Research Center of Hierarchical Nanomaterials, School of Materials Science and Engineering, East China University of Science and Technology, Shanghai 200237, China

<sup>b</sup> State Key Laboratory of Coal Conversion, Institute of Coal Chemistry, Chinese Academy of Sciences, Taiyuan 030001, China

\* Corresponding author. E-mail: zhoyuj@ecust.edu.cn (YJ Zhou), ysli@ecust.edu.cn (YS Li)

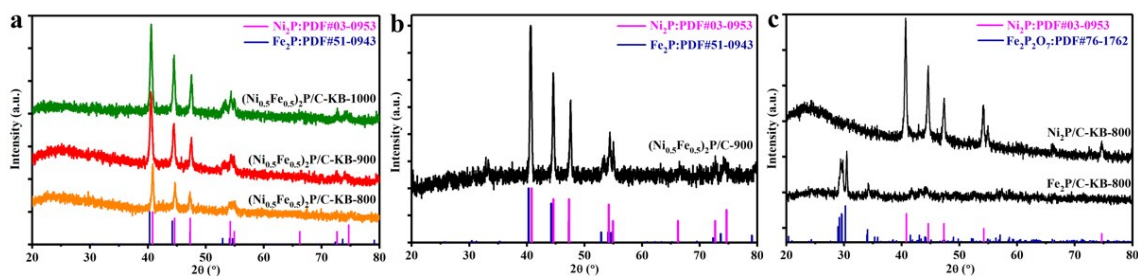

**Fig. S1** XRD patterns of (a)  $(\text{Ni}_{0.5}\text{Fe}_{0.5})_2\text{P}/\text{C-KB-T}$  ( $T=800, 900, 1000$ ), (b)  $(\text{Ni}_{0.5}\text{Fe}_{0.5})_2\text{P}/\text{C-900}$  and (c)  $\text{Ni}_2\text{P}/\text{C-KB-800}$  and  $\text{Fe}_2\text{P}/\text{C-KB-800}$ .

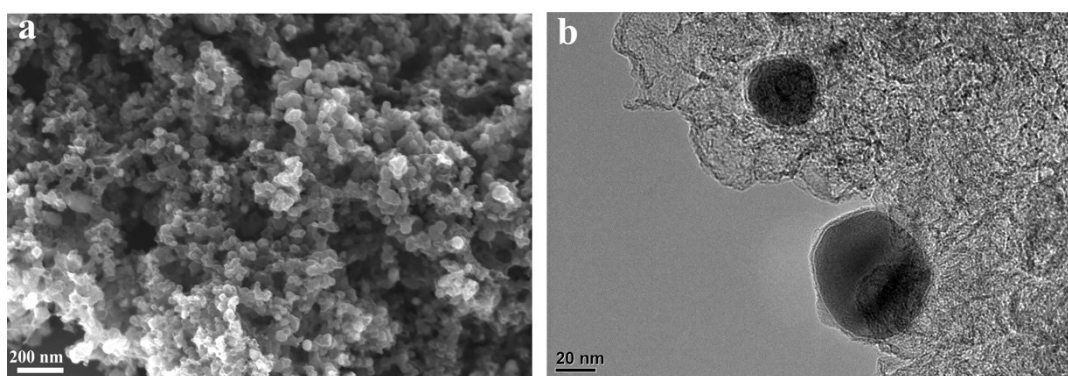

**Fig. S2** (a) SEM and (b) TEM images of  $(\text{Ni}_{0.5}\text{Fe}_{0.5})_2\text{P}/\text{C-900-KB}$ .

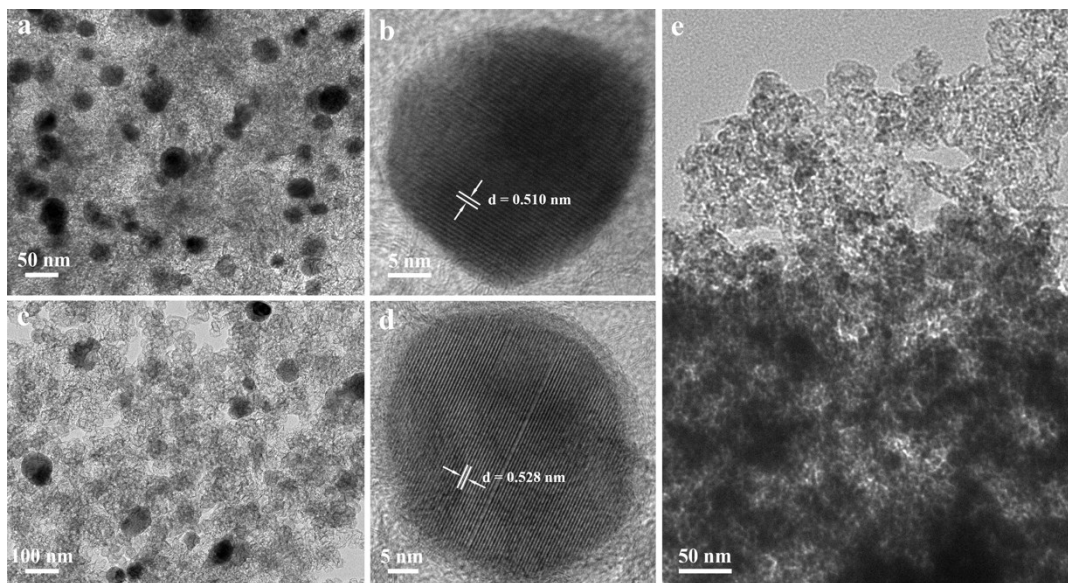

**Fig. S3** TEM images of (a)  $\text{Ni}_2\text{P/C-KB-900}$ , (c)  $\text{Fe}_2\text{P/C-KB-900}$  and (e)  $(\text{Ni}_{0.5}\text{Fe}_{0.5})_2\text{P/C-900}$ .

HRTEM images of (b)  $\text{Ni}_2\text{P/C-KB-900}$  and (d)  $\text{Fe}_2\text{P/C-KB-900}$ .

**Tab. S1** Ni, Fe contents detected by ICP-OES and BET specific surface area of  $(\text{Ni}_{0.5}\text{Fe}_{0.5})_2\text{P/C-900}$  and  $(\text{Ni}_{1-x}\text{Fe}_x)_2\text{P/C-KB-900}$  ( $x=0, 0.2, 0.5, 0.8, 1$ ).

| Catalyst                                              | Fe (wt%) | Ni (wt%) | $S_{\text{BET}}$ ( $\text{m}^2 \text{g}^{-1}$ ) |
|-------------------------------------------------------|----------|----------|-------------------------------------------------|
| $\text{Ni}_2\text{P/C-KB-900}$                        | -        | 18.19    | 688                                             |
| $(\text{Ni}_{0.8}\text{Fe}_{0.2})_2\text{P/C-KB-900}$ | 3.91     | 15.26    | 609                                             |
| $(\text{Ni}_{0.5}\text{Fe}_{0.5})_2\text{P/C-KB-900}$ | 8.94     | 8.22     | 684                                             |
| $(\text{Ni}_{0.2}\text{Fe}_{0.8})_2\text{P/C-KB-900}$ | 13.96    | 3.52     | 581                                             |
| $\text{Fe}_2\text{P/C-KB-900}$                        | 15.08    | -        | 660                                             |
| $(\text{Ni}_{0.5}\text{Fe}_{0.5})_2\text{P/C-900}$    | 20.11    | 27.00    | 121                                             |

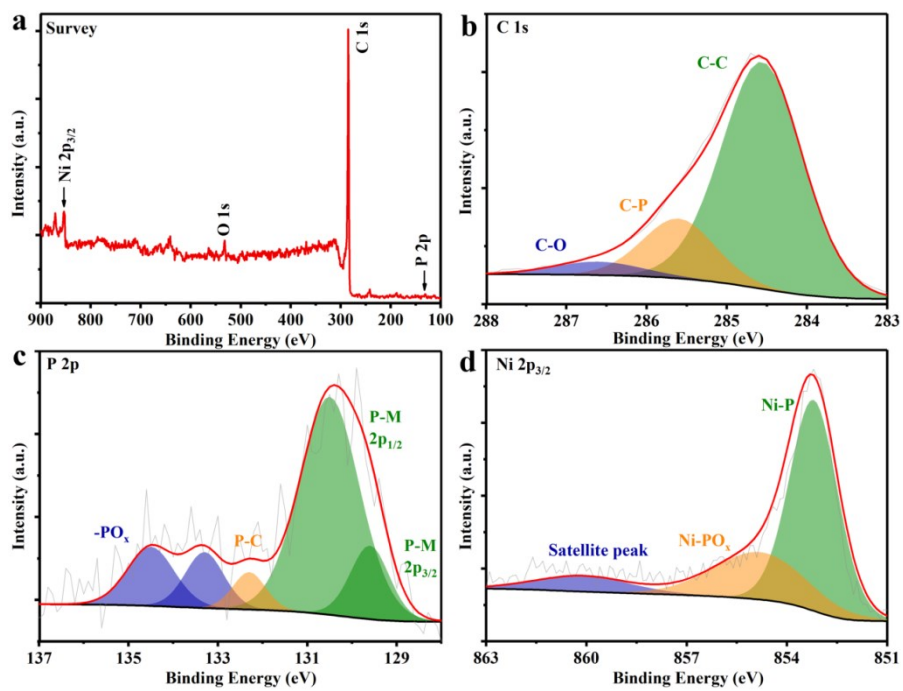

**Fig. S4** (a) XPS survey spectrum and (b) C 1s, (c) P 2p and (d) Ni 2p high-resolution XPS spectra of  $\text{Ni}_2\text{P}/\text{C-KB-900}$ .

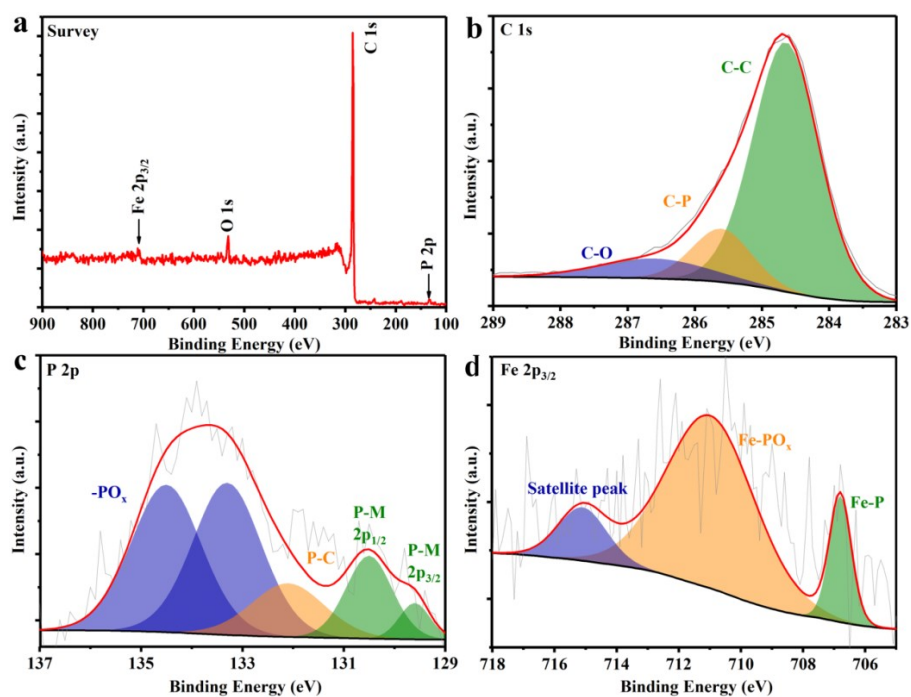

**Fig. S5** (a) XPS survey spectrum and (b) C 1s, (c) P 2p and (d) Fe 2p high-resolution XPS spectra of the Fe<sub>2</sub>P/C-KB-900

**Tab. S2** Summary of OER performance in 1 M KOH solution of the as-prepared  $(\text{Ni}_{0.5}\text{Fe}_{0.5})_2\text{P/C-900}$  and  $(\text{Ni}_{1-x}\text{Fe}_x)_2\text{P/C-KB-900}$  ( $x=0, 0.2, 0.5, 0.8, 1$ ).

| Sample                                                | $\eta_{10}$<br>[mV] | $\eta_{20}$<br>[mV] | Tafel Slope<br>[mV dec <sup>-1</sup> ] | $R_{ct}$<br>[ $\Omega$ ] | $C_{dl}$<br>[mF cm <sup>-2</sup> ] | TOF*<br>[s <sup>-1</sup> ] |
|-------------------------------------------------------|---------------------|---------------------|----------------------------------------|--------------------------|------------------------------------|----------------------------|
| $\text{Ni}_2\text{P/C-KB-900}$                        | 350                 | 379                 | 110                                    | 36.2                     | 15.3                               | 0.029                      |
| $(\text{Ni}_{0.8}\text{Fe}_{0.2})_2\text{P/C-KB-900}$ | 285                 | 308                 | 89                                     | 5.8                      | 16.3                               | 0.123                      |
| $(\text{Ni}_{0.5}\text{Fe}_{0.5})_2\text{P/C-KB-900}$ | 272                 | 296                 | 77                                     | 4.2                      | 23.1                               | 0.162                      |
| $(\text{Ni}_{0.2}\text{Fe}_{0.8})_2\text{P/C-KB-900}$ | 307                 | 333                 | 94                                     | 14.9                     | 18.8                               | 0.085                      |
| $\text{Fe}_2\text{P/C-KB-900}$                        | 343                 | 373                 | 107                                    | 67.0                     | 10.7                               | 0.042                      |
| $(\text{Ni}_{0.5}\text{Fe}_{0.5})_2\text{P/C-900}$    | 365                 | 398                 | 165                                    | 128.5                    | 3.0                                | 0.008                      |

\*The turn-over frequencies (TOFs) values have been calculated according to the equation of  $\text{TOFs} = (J \cdot A) / (4 \cdot F \cdot n)$ . Here J is the geometrical current density at a given overpotential (0.35 V), and A is the surface area of the electrode (0.2827 cm<sup>2</sup>). The number 4 represents four-electron transfer per mole of O<sub>2</sub>. F is the Faraday constant (96485 C mol<sup>-1</sup>), and n is the number of moles of the active sites on the electrode. It is assumed that only the phosphides as the active sites, which can be calculated through the formula of  $(n(\text{Ni}) + n(\text{Fe})) / 2$ . The Ni, Fe contents were obtained from ICP-OES results.

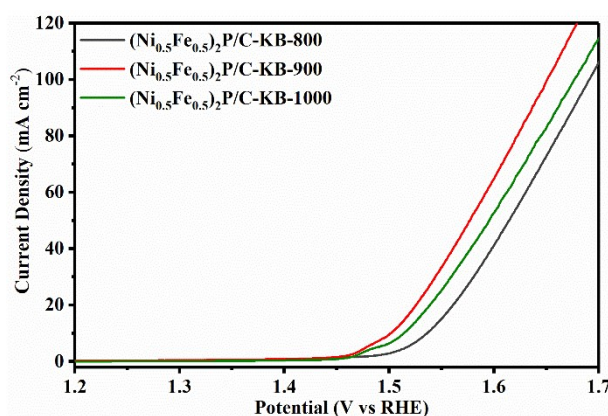

**Fig. S6** The OER polarization curves of  $(\text{Ni}_{0.5}\text{Fe}_{0.5})_2\text{P/C-KB-T}$  ( $T=800, 900, 1000$ ).

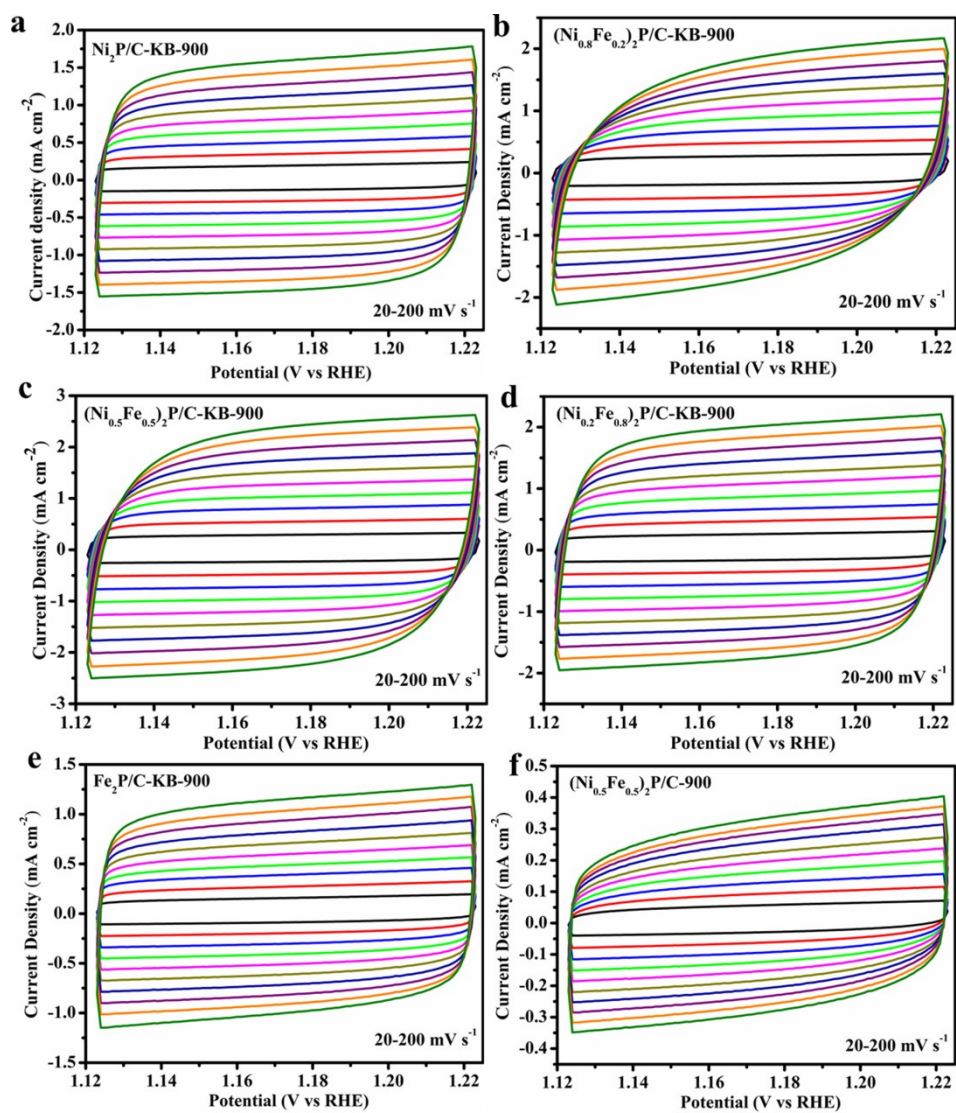

**Fig. S7** CV curves in the potential region of 1.123-1.223 V with various scan rates (20-200 mV s<sup>-1</sup>)

in 1 M KOH solution for (a) Ni<sub>2</sub>P/C-KB-900, (b) (Ni<sub>0.8</sub>Fe<sub>0.2</sub>)<sub>2</sub>P/C-KB-900, (c) (Ni<sub>0.5</sub>Fe<sub>0.5</sub>)<sub>2</sub>P/C-KB-900, (d) (Ni<sub>0.2</sub>Fe<sub>0.8</sub>)<sub>2</sub>P/C-KB-900, (e) Fe<sub>2</sub>P/C-KB-900 and (f) (Ni<sub>0.5</sub>Fe<sub>0.5</sub>)<sub>2</sub>P/C-900.
